# Supplementary material for: DEFECTIVE EMBRYO AND MERISTEMS1 (DEM1) Is Essential for Cell Proliferation and Cell Differentiation in Tomato
Source: MDPI journal article supplement (doi:10.3390/plants11192545), 2022-09-28
Supplement: s1 [file s1]

# DEFECTIVE EMBRYO AND MERISTEMS1 (DEM1) Is Essential for Cell Proliferation and Cell Differentiation in Tomato

Louisa Matthew <sup>1,†</sup>, Melquiades E. C. Reyes <sup>1,†</sup>, Christopher W. G. Mann <sup>1</sup>, Alasdair W. McDowall <sup>2,3</sup>, Andrew L. Eamens <sup>1,4,\*</sup> and Bernard J. Carroll <sup>1,\*</sup>

<sup>1</sup> School of Chemistry and Molecular Biosciences, The University of Queensland, St. Lucia, QLD 4072, Australia  
<sup>2</sup> Centre for Microscopy and Microanalysis, The University of Queensland, St. Lucia, QLD 4072, Australia  
<sup>3</sup> California Institute of Technology, Pasadena, CA 91125, USA  
<sup>4</sup> School of Health and Behavioural Sciences, University of the Sunshine Coast, Maroochydore, QLD 4558, Australia  
\* Correspondence: aeamens@usc.edu.au (A.L.E.); b.carroll@uq.edu.au (B.J.C.)  
† These authors contributed equally to this work.

**Table S1.** DNA oligonucleotides used in this study. The 5′ to 3′ sequence of each DNA oligonucleotide used in this study for plant expression vector construction, SMD transformant analysis, RT-qPCR analysis, and Southern and northern blot hybridization analysis is listed below with the specific use of each DNA oligonucleotide provided in the Materials and Methods section.

| Oligonucleotide Name                                                                     | Target Sequence / Oligonucleotide Use | Sequence (5′ – 3′)                             |
|------------------------------------------------------------------------------------------|---------------------------------------|------------------------------------------------|
| Plant Expression Vector Construction                                                     |                                       |                                                |
| DEM1-PRO-F                                                                               | <i>SIDEM1</i> promoter                | GGGTGATCACTGCAGTAATTTATATTGACATAATGAAGGC       |
| Ex1-R                                                                                    | <i>SIDEM1</i> exon-1                  | CCCTCTAGACCCATGAAAATTGAGCACTGCGGAAGCTT         |
| 3UTR-F                                                                                   | <i>SIDEM1</i> 3′ UTR                  | CCCTCTAGAACAATCATTCTGTTGATATATGCAACTTATTAG     |
| 3UTR-R                                                                                   | <i>SIDEM1</i> 3′ UTR                  | AGACTACTTGCAGTTAAGAAGGAGATAGAGGCT              |
| Ex2-F                                                                                    | <i>SIDEM1</i> exon-2                  | GGGATCGATGGTCACCGAGAATGGGAAGCAAGAG             |
| Ex2-F                                                                                    | <i>SIDEM1</i> exon-2                  | CCCTCTAGATCATATTTGTAAAGCGCCTGCTAGAG            |
| NLS-F                                                                                    | <i>SIDEM1</i> NLS                     | GGGATCGATGGTTAACCATGATTTGAGGGAGGAGTTTGAGGAGGCA |
| SMD Transformant Analysis (mapping of <i>Ds</i> insertions into the <i>SIDEM1</i> locus) |                                       |                                                |
| DEM5                                                                                     | <i>SIDEM1</i> 5′ terminus             | TTTCTCCTCCTTAAATGCATTGAG                       |
| DEM3                                                                                     | <i>SIDEM1</i> 3′ terminus             | TTCATGTTGGTGGAACACTGCGA                        |
| B34                                                                                      | <i>Ds</i> element (3′ region)         | ACGGTCGGTACGGGATTTTCCCAT                       |
| B39                                                                                      | <i>Ds</i> element (5′ region)         | GTTTTTCGTTTCCGTCCCGCAA                         |
| D71                                                                                      | <i>Ds</i> element (5′ region)         | CCGTTACCGACCGTTTTTCATCCCTA                     |
| D73                                                                                      | <i>Ds</i> element (3′ region)         | GAACGCGACATAATGGTTTCTGACG                      |
| Reverse Transcriptase Quantitative Polymerase Chain Reaction (RT-qPCR) Analysis          |                                       |                                                |
| TUB-RTF                                                                                  | <i>SITUB1</i> gene                    | CGATTCCGTTCTTGT                                |
| TUB-RTR                                                                                  | <i>SITUB1</i> gene                    | AATGAGTGACACACTTGAATCCTT                       |
| Ex2-RTF                                                                                  | <i>SIDEM1</i> exon-2                  | CGCTGTTTCTGACTCACCTGAA                         |
| Ex2-RTR                                                                                  | <i>SIDEM1</i> exon-2                  | GCCTGCTAGAGATGCTGAATGA                         |
| Probe Synthesis For Nucleic Acid Hybridization (Southern or Northern Blotting) Analysis  |                                       |                                                |
| OLI-DT15                                                                                 | mRNA poly-A tails                     | TTTTTTTTTTTTTTTT                               |
| DEM1-PF                                                                                  | <i>SIDEM1</i> cDNA                    | TTCAAATGGGTGCTAATCACAGC                        |
| DEM1-PR                                                                                  | <i>SIDEM1</i> cDNA                    | ATTGTTCAAATTTGTAAGCGCCT                        |
| DEM2-PF                                                                                  | <i>SIDEM2</i> cDNA                    | GAGAAATGTCCACCATGGAACCTCGTTG                   |
| DEM2-PR                                                                                  | <i>SIDEM2</i> cDNA                    | CCCTTTGTTTACGGATAAAGCTGGGAAG                   |
| DEM2-PF2                                                                                 | <i>SIDEM2</i> cDNA                    | CCCAGCTATATGCGCATCCACAGGAGTCAG                 |
| DEM2-PR2                                                                                 | <i>SIDEM2</i> cDNA                    | GGATTAAAGCTGACTCCTGTGGATGCG                    |
| PHAN-PF                                                                                  | <i>SIPHAN</i> cDNA                    | GGGGAATTCATGAGGAGAGGCAACGG                     |
| PHAN-PR                                                                                  | <i>SIPHAN</i> cDNA                    | GGGGGAAGTCGCGGCAAGTAGAAA                       |
| TKN1-PF1                                                                                 | <i>SITKN1</i> cDNA                    | CTTGATTTAGGGTTTTTTTTTCCCC                      |

|          |                    |                                              |
|----------|--------------------|----------------------------------------------|
| TKN1-PR1 | <i>SITKN1</i> cDNA | GTGCTTAGGCCTATAAGGCTTGC                      |
| TKN1-PF2 | <i>SITKN1</i> cDNA | GGGGAATTCATGGAGAATAATAATTATAATAATCATGTGTCTGG |
| TKN1-PR2 | <i>SITKN1</i> cDNA | GGGGGATCCAAAATTCATAAATATTACTGACCCAAACGAAAAGG |
| TKN2-PF1 | <i>SITKN2</i> cDNA | GATCACTTACACACACACACACCC                     |
| TKN2-PR1 | <i>SITKN2</i> cDNA | GCTTGTACTACTACATGCACAC                       |
| TKN2-PF2 | <i>SITKN2</i> cDNA | GGGGAATTCATGGAGGGTGGTTCTAGTGG                |
| TKN2-PR2 | <i>SITKN2</i> cDNA | GATCACTTACACACACACACACCC                     |
| BAR-R-PF | <i>BAR</i> gene    | CGAGATAGGGTTGAGTGTGTTCC                      |
| BAR-R-PR | <i>BAR</i> gene    | AGACAAGCACGGTCAACTTCCGTA                     |
| NPTII-PF | <i>NPTII</i> gene  | GAATTAAGGGAGTCACGTTATGACC                    |
| NPTII-PR | <i>NPTII</i> gene  | CAGAAGAACTCGTCAAGAAGGCG                      |
